# Supplementary material for: Diospyros rhodocalyx Kurz induces mitochondrial-mediated apoptosis via BAX, Bcl-2, and caspase-3 pathways in LNCaP human prostate cancer cell line
Source: PeerJ. 2024 Jul 1;12:e17637. doi: 10.7717/peerj.17637 (PMC11223595; doi:10.7717/peerj.17637)
Supplement: Supplemental Information 1 — Results from MTS assay, cell cycle analysis, apoptosis, mitochondrial membrane potential, and western blot. [file peerj-12-17637-s001.xlsx]

## Sheet: MTS assay
%Cell viability
	LNCaP 24h			LNCaP 48h
EADR (µg/mL)	N1	N2	N3	N1	N2	N3
0	100	100	100	100	100	100
1%DMSO	93.2017	100.201	87.5725	90.7511	101.681	88.0912
5	87.09	80.9629	78.3099	80.3716	82.4941	78.2609
10	71.3252	66.2287	65.8244	58.6812	56.4075	61.8981
20	36.1016	40.1905	33.9271	22.3437	27.248	21.8747
30	10.343	20.5582	17.5642	12.5834	15.0324	11.9009
40	7.57592	10.8632	15.56	2.98473	5.66028	4.79628
IC50	16.0814	15.3315	14.8979	12.3325	11.8826	12.8604
	WPMY-1 24h			WPMY-1 48h
EADR (µg/mL)	N1	N2	N3	N1	N2	N3
0	100	100	100	100	100	100
1%DMSO	100.632	101.826	103.468	102.165	103.323	104.976
5	101.319	100.273	107.382	100.777	104.967	102.691
10	101.337	96.7758	98.0074	94.3124	86.5377	87.6621
20	93.9489	90.3254	94.5275	50.0603	56.0369	57.8892
30	60.855	68.1386	68.3286	14.3293	10.8555	14.2323
40	25.3299	32.2119	28.0952	13.8283	10.0897	13.9844
IC50	33.6262	35.3303	34.8821	19.7405	19.8316	20.2459

## Sheet: Cell cycle
% Cell population (PI-staining)
	LNCaP 24h
	Sub-G1			G1			S			G2
EADR (µg/mL)	N1	N2	N3	N1	N2	N3	N1	N2	N3	N1	N2	N3
0	5.15	8.77	6.13	67.97	88.56	63.9	25.63	4.02	19.88	6.4	7.42	16.22
5	8.21	7.81	9.85	81.75	84.57	74.53	3.75	3.54	8.62	14.5	11.89	16.84
10	14.28	12.86	11.03	76.41	83.99	86.82	7.93	2.43	4.84	15.66	13.58	8.34
15	42.5	36.49	27.55	73.47	68.23	83.56	10.045	14.65	8.73	16.09	17.12	7.71
	WPMY-1 24h
	Sub-G1			G1			S			G2
EADR (µg/mL)	N1	N2	N3	N1	N2	N3	N1	N2	N3	N1	N2	N3
0	4.68	4.79	4.67	62.49	54.58	36.58	32.01	28.97	46.05	17.88	16.46	17.37
5	3.01	8.34	4.03	64.45	51.31	50.11	22.94	22.51	32.01	12.61	26.18	17.88
10	3.54	2.25	5.84	61.89	55.6	47.96	22.85	35.41	34.1	15.26	7.99	17.94
15	4.09	5.53	5.4	61.13	46.47	46.11	22.89	34.22	33.85	15.98	19.31	20.03

## Sheet: Apoptosis
% Total Apoptosis (Annexin-V/PI staining)
	LNCaP 24h			WPMY-1 24h
EADR (µg/mL)	N1	N2	N3	N1	N2	N3
0	12.35	15.32	20.57	14.47	16.7	8.63
5	22.58	21.79	23.38	18.14	16.25	16.59
10	31.29	36.3	36.8	28.2	7.25	15.69
15	43.4	43.1	45.2	16.84	23.01	14.84
% Viable cells (Annexin-V/PI staining)
	LNCaP 24h			WPMY-1 24h
EADR (µg/mL)	N1	N2	N3	N1	N2	N3
0	85.6	83.7	79	82.9	80.3	89.8
5	77	77.3	69.3	77.1	79.6	79.5
10	66.7	62.6	57.5	69.5	91.1	81.1
15	55.9	54.6	48.7	80.4	74.8	82.4

## Sheet: MMP
% Cell population (JC-1 staining)
	LNCaP 24h
	JC-1 Red (Aggregation)			JC-1 Green (Monomer)
EADR (µg/mL)	N1	N2	N3	N1	N2	N3
0	96.6	88.9	95.9	4.02	5.79	4.47
5	89.2	81.3	93.2	7.56	11.8	6.85
10	67	73.2	84.6	25.1	18.9	14.7
15	68.9	54.7	65.5	24.7	38.5	34.5
50 μM CCCP	1.23	0.47	1.58	93.1	96.9	98.4
	Relative ratio Red/Green
EADR (µg/mL)	N1	N2	N3
0	24.0299	15.3541	21.4541
5	11.7989	6.88983	13.6058
10	2.66932	3.87302	5.7551
15	2.78947	1.42078	1.89855
50 μM CCCP	0.0132116	0.00485036	0.0160569

## Sheet: Western Blot
	LNCaP
	BAX			Bcl-2			Cleaved caspase-3
EADR (µg/mL)	N1	N2	N3	N1	N2	N3	N1	N2	N3
0	1	1	1	1	1	1	1	1	1
5	1.96101	1.72866	1.98382	1.04333	0.97003	1.12507	1.50167	1.03828	1.57268
10	1.95874	1.87051	2.15968	1.03248	0.980149	1.09803	2.28782	1.49281	4.0492
15	2.18067	1.69793	2.37636	0.760417	0.553794	0.866936	5.07301	6.51495	8.31878
20	2.46301	2.43504	2.7751	0.608489	0.64903	0.762504	15.6229	12.5027	13.4588
